# Supplementary material
Source: publisher figshare collection journal article supplement (https://acs.figshare.com/ndownloader/files/4656775)
Supplement: Supplementary file 1 [file 4656775]

 
data_import
 
_audit_creation_method            SHELXL-97
_chemical_name_systematic
;
 ?
;
_chemical_name_common             (TPP)GaCH3
_chemical_melting_point           ?
_chemical_formula_moiety          ?
_chemical_formula_sum
 'C45 H31 Ga N4'
_chemical_formula_weight          697.46
 
loop_
 _atom_type_symbol
 _atom_type_description
 _atom_type_scat_dispersion_real
 _atom_type_scat_dispersion_imag
 _atom_type_scat_source
 'C'  'C'   0.0033   0.0016
 'International Tables Vol C Tables 4.2.6.8 and 6.1.1.4'
 'H'  'H'   0.0000   0.0000
 'International Tables Vol C Tables 4.2.6.8 and 6.1.1.4'
 'Ga'  'Ga'   0.2307   1.6083
 'International Tables Vol C Tables 4.2.6.8 and 6.1.1.4'
 'N'  'N'   0.0061   0.0033
 'International Tables Vol C Tables 4.2.6.8 and 6.1.1.4'
 
_symmetry_cell_setting            tetragonal
_symmetry_space_group_name_H-M    I4/m
 
loop_
 _symmetry_equiv_pos_as_xyz
 'x, y, z'
 '-x, -y, z'
 '-y, x, z'
 'y, -x, z'
 'x+1/2, y+1/2, z+1/2'
 '-x+1/2, -y+1/2, z+1/2'
 '-y+1/2, x+1/2, z+1/2'
 'y+1/2, -x+1/2, z+1/2'
 '-x, -y, -z'
 'x, y, -z'
 'y, -x, -z'
 '-y, x, -z'
 '-x+1/2, -y+1/2, -z+1/2'
 'x+1/2, y+1/2, -z+1/2'
 'y+1/2, -x+1/2, -z+1/2'
 '-y+1/2, x+1/2, -z+1/2'
 
_cell_length_a                    13.536(2)
_cell_length_b                    13.536(2)
_cell_length_c                    9.6581(17)
_cell_angle_alpha                 90.00
_cell_angle_beta                  90.00
_cell_angle_gamma                 90.00
_cell_volume                      1769.7(5)
_cell_formula_units_Z             2
_cell_measurement_temperature     130(2)
_cell_measurement_reflns_used     ?
_cell_measurement_theta_min       ?
_cell_measurement_theta_max       ?
 
_exptl_crystal_description        block
_exptl_crystal_colour             purple
_exptl_crystal_size_max           0.24
_exptl_crystal_size_mid           0.24
_exptl_crystal_size_min           0.06
_exptl_crystal_density_meas       ?
_exptl_crystal_density_diffrn     1.309
_exptl_crystal_density_method     'not measured'
_exptl_crystal_F_000              720
_exptl_absorpt_coefficient_mu     0.815
_exptl_absorpt_correction_type    multi-scan
_exptl_absorpt_correction_T_min   0.8283
_exptl_absorpt_correction_T_max   0.9527
_exptl_absorpt_process_details    HKL-2000
 
_exptl_special_details
;
 ?
;
 
_diffrn_ambient_temperature       130(2)
_diffrn_radiation_wavelength      0.71073
_diffrn_radiation_type            MoK\a
_diffrn_radiation_source          'fine-focus sealed tube'
_diffrn_radiation_monochromator   graphite
_diffrn_reflns_number             1428
_diffrn_reflns_av_R_equivalents   0.1027
_diffrn_reflns_av_sigmaI/netI     0.1262
_diffrn_reflns_limit_h_min        -16
_diffrn_reflns_limit_h_max        16
_diffrn_reflns_limit_k_min        -16
_diffrn_reflns_limit_k_max        16
_diffrn_reflns_limit_l_min        -11
_diffrn_reflns_limit_l_max        11
_diffrn_reflns_theta_min          3.01
_diffrn_reflns_theta_max          25.32
_reflns_number_total              839
_reflns_number_gt                 501
_reflns_threshold_expression      >2sigma(I)
 
_computing_data_collection        ?
_computing_cell_refinement        ?
_computing_data_reduction         ?
_computing_structure_solution     ?
_computing_structure_refinement   'SHELXL-97 (Sheldrick, 1997)'
_computing_molecular_graphics     ?
_computing_publication_material   ?
 
_refine_special_details
;
 Refinement of F^2^ against ALL reflections.  The weighted R-factor wR and
 goodness of fit S are based on F^2^, conventional R-factors R are based
 on F, with F set to zero for negative F^2^. The threshold expression of
 F^2^ > 2sigma(F^2^) is used only for calculating R-factors(gt) etc. and is
 not relevant to the choice of reflections for refinement.  R-factors based
 on F^2^ are statistically about twice as large as those based on F, and R-
 factors based on ALL data will be even larger.
;
 
_refine_ls_structure_factor_coef  Fsqd
_refine_ls_matrix_type            full
_refine_ls_weighting_scheme       calc
_refine_ls_weighting_details
 'calc w=1/[\s^2^(Fo^2^)+(0.0477P)^2^+0.0000P] where P=(Fo^2^+2Fc^2^)/3'
_atom_sites_solution_primary      direct
_atom_sites_solution_secondary    difmap
_atom_sites_solution_hydrogens    geom
_refine_ls_hydrogen_treatment     constr
_refine_ls_extinction_method      none
_refine_ls_extinction_coef        ?
_refine_ls_number_reflns          839
_refine_ls_number_parameters      73
_refine_ls_number_restraints      0
_refine_ls_R_factor_all           0.1143
_refine_ls_R_factor_gt            0.0619
_refine_ls_wR_factor_ref          0.1458
_refine_ls_wR_factor_gt           0.1280
_refine_ls_goodness_of_fit_ref    1.001
_refine_ls_restrained_S_all       1.001
_refine_ls_shift/su_max           0.000
_refine_ls_shift/su_mean          0.000
 
loop_
 _atom_site_label
 _atom_site_type_symbol
 _atom_site_fract_x
 _atom_site_fract_y
 _atom_site_fract_z
 _atom_site_U_iso_or_equiv
 _atom_site_adp_type
 _atom_site_occupancy
 _atom_site_symmetry_multiplicity
 _atom_site_calc_flag
 _atom_site_refinement_flags
 _atom_site_disorder_assembly
 _atom_site_disorder_group
C1 C 0.4746(3) 0.7231(3) 0.5000 0.0428(12) Uani 1 2 d S . .
C2 C 0.5295(4) 0.8137(4) 0.5000 0.0552(14) Uani 1 2 d S . .
H2 H 0.5028 0.8786 0.5000 0.066 Uiso 1 2 calc SR . .
C3 C 0.6264(4) 0.7896(3) 0.5000 0.0515(13) Uani 1 2 d S . .
H3 H 0.6806 0.8342 0.5000 0.062 Uiso 1 2 calc SR . .
C4 C 0.6318(3) 0.6823(4) 0.5000 0.0475(12) Uani 1 2 d S . .
C5 C 0.7183(3) 0.6294(3) 0.5000 0.0456(12) Uani 1 2 d S . .
C6 C 0.8143(3) 0.6850(3) 0.5000 0.0455(12) Uani 1 2 d S . .
C7 C 0.8594(3) 0.7105(3) 0.3788(4) 0.0760(14) Uani 1 1 d . . .
H7 H 0.8302 0.6920 0.2931 0.091 Uiso 1 1 calc R . .
C8 C 0.9473(3) 0.7633(3) 0.3791(5) 0.0776(13) Uani 1 1 d . . .
H8 H 0.9773 0.7811 0.2938 0.093 Uiso 1 1 calc R . .
C9 C 0.9907(4) 0.7896(4) 0.5000 0.0564(15) Uani 1 2 d S . .
H9 H 1.0507 0.8261 0.5000 0.068 Uiso 1 2 calc SR . .
C10 C 0.5000 0.5000 0.2326(17) 0.072(5) Uani 0.50 4 d SP . .
H10A H 0.5643 0.4772 0.1988 0.108 Uiso 0.13 1 calc P . .
H10B H 0.4876 0.5671 0.1988 0.108 Uiso 0.13 1 calc P . .
H10C H 0.4481 0.4557 0.1988 0.108 Uiso 0.13 1 calc P . .
Ga1 Ga 0.5000 0.5000 0.44517(16) 0.0499(6) Uani 0.50 4 d SP . .
N1 N 0.5368(3) 0.6433(3) 0.5000 0.0431(10) Uani 1 2 d S . .
 
loop_
 _atom_site_aniso_label
 _atom_site_aniso_U_11
 _atom_site_aniso_U_22
 _atom_site_aniso_U_33
 _atom_site_aniso_U_23
 _atom_site_aniso_U_13
 _atom_site_aniso_U_12
C1 0.047(3) 0.043(3) 0.038(3) 0.000 0.000 0.001(2)
C2 0.061(3) 0.050(3) 0.054(4) 0.000 0.000 -0.002(3)
C3 0.058(3) 0.047(3) 0.050(3) 0.000 0.000 -0.006(2)
C4 0.046(3) 0.053(3) 0.044(3) 0.000 0.000 0.000(2)
C5 0.044(3) 0.049(3) 0.044(3) 0.000 0.000 -0.002(2)
C6 0.042(3) 0.048(3) 0.047(3) 0.000 0.000 0.001(2)
C7 0.071(3) 0.114(4) 0.043(3) 0.008(2) -0.004(2) -0.032(3)
C8 0.068(3) 0.103(3) 0.062(3) 0.004(2) 0.013(2) -0.032(2)
C9 0.046(3) 0.055(3) 0.068(4) 0.000 0.000 -0.003(2)
C10 0.073(6) 0.073(6) 0.069(13) 0.000 0.000 0.000
Ga1 0.0513(7) 0.0513(7) 0.0471(12) 0.000 0.000 0.000
N1 0.046(2) 0.047(2) 0.037(2) 0.000 0.000 0.003(2)
 
_geom_special_details
;
 All esds (except the esd in the dihedral angle between two l.s. planes)
 are estimated using the full covariance matrix.  The cell esds are taken
 into account individually in the estimation of esds in distances, angles
 and torsion angles; correlations between esds in cell parameters are only
 used when they are defined by crystal symmetry.  An approximate (isotropic)
 treatment of cell esds is used for estimating esds involving l.s. planes.
;
 
loop_
 _geom_bond_atom_site_label_1
 _geom_bond_atom_site_label_2
 _geom_bond_distance
 _geom_bond_site_symmetry_2
 _geom_bond_publ_flag
C1 N1 1.369(6) . ?
C1 C5 1.409(6) 3_655 ?
C1 C2 1.434(6) . ?
C2 C3 1.351(6) . ?
C2 H2 0.9500 . ?
C3 C4 1.454(6) . ?
C3 H3 0.9500 . ?
C4 C5 1.373(6) . ?
C4 N1 1.391(6) . ?
C5 C1 1.409(6) 11_566 ?
C5 C6 1.502(6) . ?
C6 C7 1.365(4) 10_556 ?
C6 C7 1.365(4) . ?
C7 C8 1.387(5) . ?
C7 H7 0.9500 . ?
C8 C9 1.355(5) . ?
C8 H8 0.9500 . ?
C9 C8 1.355(5) 10_556 ?
C9 H9 0.9500 . ?
C10 Ga1 2.053(17) . ?
C10 H10A 0.9800 . ?
C10 H10B 0.9800 . ?
C10 H10C 0.9800 . ?
Ga1 Ga1 1.059(3) 9_666 ?
Ga1 N1 2.071(3) 3_655 ?
Ga1 N1 2.071(3) 11_566 ?
Ga1 N1 2.071(3) . ?
Ga1 N1 2.071(3) 9_666 ?
N1 Ga1 2.071(3) 9_666 ?
 
loop_
 _geom_angle_atom_site_label_1
 _geom_angle_atom_site_label_2
 _geom_angle_atom_site_label_3
 _geom_angle
 _geom_angle_site_symmetry_1
 _geom_angle_site_symmetry_3
 _geom_angle_publ_flag
N1 C1 C5 125.3(4) . 3_655 ?
N1 C1 C2 110.9(4) . . ?
C5 C1 C2 123.9(4) 3_655 . ?
C3 C2 C1 107.2(4) . . ?
C3 C2 H2 126.4 . . ?
C1 C2 H2 126.4 . . ?
C2 C3 C4 106.9(4) . . ?
C2 C3 H3 126.6 . . ?
C4 C3 H3 126.6 . . ?
C5 C4 N1 126.2(4) . . ?
C5 C4 C3 124.4(4) . . ?
N1 C4 C3 109.4(4) . . ?
C4 C5 C1 124.1(4) . 11_566 ?
C4 C5 C6 118.4(4) . . ?
C1 C5 C6 117.4(4) 11_566 . ?
C7 C6 C7 118.2(5) 10_556 . ?
C7 C6 C5 120.9(2) 10_556 . ?
C7 C6 C5 120.9(2) . . ?
C6 C7 C8 120.8(4) . . ?
C6 C7 H7 119.6 . . ?
C8 C7 H7 119.6 . . ?
C9 C8 C7 120.6(4) . . ?
C9 C8 H8 119.7 . . ?
C7 C8 H8 119.7 . . ?
C8 C9 C8 119.0(5) . 10_556 ?
C8 C9 H9 120.5 . . ?
C8 C9 H9 120.5 10_556 . ?
Ga1 C10 H10A 109.5 . . ?
Ga1 C10 H10B 109.5 . . ?
H10A C10 H10B 109.5 . . ?
Ga1 C10 H10C 109.5 . . ?
H10A C10 H10C 109.5 . . ?
H10B C10 H10C 109.5 . . ?
Ga1 Ga1 C10 180.000(6) 9_666 . ?
Ga1 Ga1 N1 75.19(5) 9_666 3_655 ?
C10 Ga1 N1 104.81(5) . 3_655 ?
Ga1 Ga1 N1 75.19(5) 9_666 11_566 ?
C10 Ga1 N1 104.81(5) . 11_566 ?
N1 Ga1 N1 150.37(10) 3_655 11_566 ?
Ga1 Ga1 N1 75.19(5) 9_666 . ?
C10 Ga1 N1 104.81(5) . . ?
N1 Ga1 N1 86.25(2) 3_655 . ?
N1 Ga1 N1 86.25(2) 11_566 . ?
Ga1 Ga1 N1 75.19(5) 9_666 9_666 ?
C10 Ga1 N1 104.81(5) . 9_666 ?
N1 Ga1 N1 86.25(2) 3_655 9_666 ?
N1 Ga1 N1 86.25(2) 11_566 9_666 ?
N1 Ga1 N1 150.37(10) . 9_666 ?
C1 N1 C4 105.6(3) . . ?
C1 N1 Ga1 126.2(3) . . ?
C4 N1 Ga1 125.3(3) . . ?
C1 N1 Ga1 126.2(3) . 9_666 ?
C4 N1 Ga1 125.3(3) . 9_666 ?
Ga1 N1 Ga1 29.63(10) . 9_666 ?
 
loop_
 _geom_torsion_atom_site_label_1
 _geom_torsion_atom_site_label_2
 _geom_torsion_atom_site_label_3
 _geom_torsion_atom_site_label_4
 _geom_torsion
 _geom_torsion_site_symmetry_1
 _geom_torsion_site_symmetry_2
 _geom_torsion_site_symmetry_3
 _geom_torsion_site_symmetry_4
 _geom_torsion_publ_flag
N1 C1 C2 C3 0.0 . . . . ?
C5 C1 C2 C3 180.0 3_655 . . . ?
C1 C2 C3 C4 0.0 . . . . ?
C2 C3 C4 C5 180.0 . . . . ?
C2 C3 C4 N1 0.0 . . . . ?
N1 C4 C5 C1 0.0 . . . 11_566 ?
C3 C4 C5 C1 180.0 . . . 11_566 ?
N1 C4 C5 C6 180.0 . . . . ?
C3 C4 C5 C6 0.0 . . . . ?
C4 C5 C6 C7 90.3(4) . . . 10_556 ?
C1 C5 C6 C7 -89.7(4) 11_566 . . 10_556 ?
C4 C5 C6 C7 -90.3(4) . . . . ?
C1 C5 C6 C7 89.7(4) 11_566 . . . ?
C7 C6 C7 C8 -1.6(8) 10_556 . . . ?
C5 C6 C7 C8 179.0(4) . . . . ?
C6 C7 C8 C9 0.7(7) . . . . ?
C7 C8 C9 C8 0.4(9) . . . 10_556 ?
C5 C1 N1 C4 180.0 3_655 . . . ?
C2 C1 N1 C4 0.0 . . . . ?
C5 C1 N1 Ga1 18.48(10) 3_655 . . . ?
C2 C1 N1 Ga1 -161.52(10) . . . . ?
C5 C1 N1 Ga1 -18.48(10) 3_655 . . 9_666 ?
C2 C1 N1 Ga1 161.52(10) . . . 9_666 ?
C5 C4 N1 C1 180.0 . . . . ?
C3 C4 N1 C1 0.0 . . . . ?
C5 C4 N1 Ga1 -18.26(10) . . . . ?
C3 C4 N1 Ga1 161.74(10) . . . . ?
C5 C4 N1 Ga1 18.26(10) . . . 9_666 ?
C3 C4 N1 Ga1 -161.74(10) . . . 9_666 ?
Ga1 Ga1 N1 C1 -101.18(13) 9_666 . . . ?
C10 Ga1 N1 C1 78.82(13) . . . . ?
N1 Ga1 N1 C1 -25.52(15) 3_655 . . . ?
N1 Ga1 N1 C1 -176.84(11) 11_566 . . . ?
N1 Ga1 N1 C1 -101.18(13) 9_666 . . . ?
Ga1 Ga1 N1 C4 100.79(13) 9_666 . . . ?
C10 Ga1 N1 C4 -79.21(13) . . . . ?
N1 Ga1 N1 C4 176.45(12) 3_655 . . . ?
N1 Ga1 N1 C4 25.13(16) 11_566 . . . ?
N1 Ga1 N1 C4 100.79(13) 9_666 . . . ?
C10 Ga1 N1 Ga1 180.0 . . . 9_666 ?
N1 Ga1 N1 Ga1 75.66(4) 3_655 . . 9_666 ?
N1 Ga1 N1 Ga1 -75.66(4) 11_566 . . 9_666 ?
N1 Ga1 N1 Ga1 0.0 9_666 . . 9_666 ?
 
_diffrn_measured_fraction_theta_max    0.972
_diffrn_reflns_theta_full              25.00
_diffrn_measured_fraction_theta_full   0.971
_refine_diff_density_max    0.203
_refine_diff_density_min   -0.263
_refine_diff_density_rms    0.047
